# Supplementary material for: Oncogenic Human Papillomaviruses Activate the Tumor-Associated Lens Epithelial-Derived Growth Factor (LEDGF) Gene
Source: PubMed Central journal article supplement (PMC3946365; doi:10.1371/journal.ppat.1003957), 2014-03-06
Supplement: ppat.1003957.s001.pdf [file ppat.1003957.s001.pdf]

**Supplemental Figure S1.**

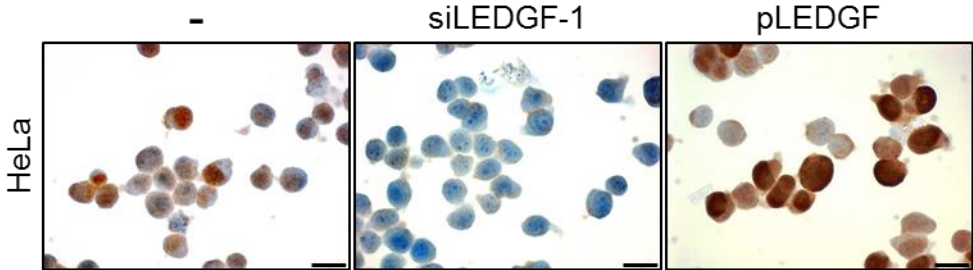

**Validation of anti-LEDGF antibody 6E4.** Untreated HeLa cells (-), HeLa cells transfected siLEDGF-1, and HeLa cells overexpressing LEDGF from pLEDGF were prepared on thin-layer cytology slides and stained for LEDGF expression. Bars correspond to 20  $\mu$ m.
